# Supplementary material
Source: MDPI journal article supplement (https://www.mdpi.com/2073-4344/12/5/555)
Supplement: s1 [file s1]

# **Highly efficient and selective carbon-doped BN photocatalyst derived from a homogeneous precursor reconfiguration**

Qiong Lu <sup>1,2</sup>, Jing An <sup>3</sup>, Yandong Duan <sup>3\*</sup>, Qingzhi Luo <sup>3</sup>, Yunyun Shang <sup>3</sup>, Qiunan Liu <sup>4</sup>, Yongfu

Tang <sup>4</sup>, Jianyu Huang <sup>3</sup>, Chengchun Tang <sup>1,2\*</sup>, Rong Yin <sup>3</sup> and Desong Wang <sup>1,3,4\*</sup>

<sup>1</sup> School of Materials Science and Engineering, Hebei University of Technology, Tianjin 300130, People's Republic of China; qiong253@163.com

<sup>2</sup> Hebei Key Laboratory of Boron Nitride Micro and Nano Materials, Hebei University of Technology, Tianjin 300130, People's Republic of China

<sup>3</sup> Hebei Key Lab of Photoelectric Control on Surface and Interface, School of Sciences, Hebei University of Science and Technology, Shijiazhuang 050018, People's Republic of China; anjinghebust@163.com; lqz2004-1@163.com; 978890711@qq.com; yinrong6868@163.com

<sup>4</sup> Applying Chemistry Key Laboratory of Hebei Province, State Key Laboratory of Metastable Materials Science and Technology, Yanshan University, Qinhuangdao, 066004, People's Republic of China; 13731790498@163.com; tangyongfu@ysu.edu.cn; jyhuang8@hotmail.com

\* Correspondence: dswang06@126.com; tangcc@hebut.edu.cn; ydduan@iccas.ac.cn

**Table S1** Crystal data and structure refinement for M·2B

|                                   |                                                                                                                           |
|-----------------------------------|---------------------------------------------------------------------------------------------------------------------------|
| Empirical formula                 | C <sub>3</sub> H <sub>12</sub> B <sub>2</sub> N <sub>6</sub> O <sub>6</sub>                                               |
| Formula weight                    | 249.81                                                                                                                    |
| Temperature                       | 190(2) K                                                                                                                  |
| Wavelength                        | 1.34139 Å                                                                                                                 |
| Crystal system                    | Monoclinic                                                                                                                |
| Space group                       | P2 <sub>1</sub> /c                                                                                                        |
| Unit cell dimensions              | a = 3.5559(5) Å $\alpha = 90^\circ$<br>b = 20.021(3) Å $\beta = 92.648(7)^\circ$<br>c = 14.0894(19) Å $\gamma = 90^\circ$ |
| Volume                            | 1002.0(2) Å <sup>3</sup>                                                                                                  |
| Z                                 | 4                                                                                                                         |
| Density (calculated)              | 1.656 g/cm <sup>3</sup>                                                                                                   |
| Absorption coefficient            | 0.819 mm <sup>-1</sup>                                                                                                    |
| F(000)                            | 520                                                                                                                       |
| Crystal size                      | 0.120 × 0.110 × 0.080 mm <sup>3</sup>                                                                                     |
| Theta range for data collection   | 3.339 to 54.080°                                                                                                          |
| Index ranges                      | -4 ≤ h ≤ 4, -24 ≤ k ≤ 24, -16 ≤ l ≤ 16                                                                                    |
| Reflections collected             | 18890                                                                                                                     |
| Independent reflections           | 1848 [R(int) = 0.0845]                                                                                                    |
| Completeness to theta = 53.594°   | 100.0 %                                                                                                                   |
| Refinement method                 | Full-matrix least-squares on F <sup>2</sup>                                                                               |
| Data / restraints / parameters    | 1848 / 0 / 160                                                                                                            |
| Goodness-of-fit on F <sup>2</sup> | 1.076                                                                                                                     |
| Final R indices [I > 2σ(I)]       | R1 = 0.0524, wR2 = 0.1464                                                                                                 |
| R indices (all data)              | R1 = 0.0688, wR2 = 0.1593                                                                                                 |
| Extinction coefficient            | n/a                                                                                                                       |
| Largest diff. peak and hole       | 0.229 and -0.332 e.Å <sup>-3</sup>                                                                                        |

Single crystal structure determination by X-ray diffraction was performed with a Bruker APEX-II CCD diffractometer equipped with a normal focus, 2.4 kW sealed tube X-ray source (Ga K $\alpha$  radiation,  $\lambda$  = 1.34139 Å) operating at 50 kV and 40 mA. A hemisphere of intensity data was collected at 190 K in the 2 $\theta$  range 3.339 to 54.080°. The structure was solved with the ShelXT [Sheldrick, 2018] structure solution program using Intrinsic Phasing and refined with the ShelXL [Sheldrick, 2018] refinement package using Least Squares minimisation.

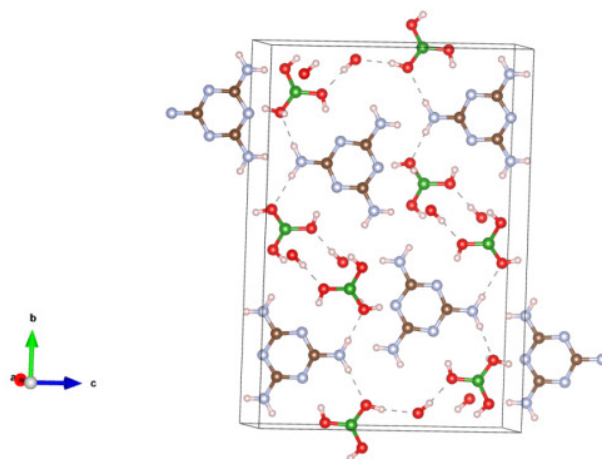

**Figure S1.** Arrangements of melamine and boric acid molecules in the crystal of M·2B, view along crystallographic an axis, dashed lines represent intermolecular hydrogen bonds. When viewed along the a-axis, melamine and boric acid molecules are connected together by hydrogen bonds to form a layer like structure in the bc-plane [1, 2]. The single crystal structure of M·2B shows the asymmetric unit and the stacking arrangement of a three-dimensional hydrogen-bonded supramolecular networks involving O–H···O, N–H···O and O–H···N hydrogen bonds.

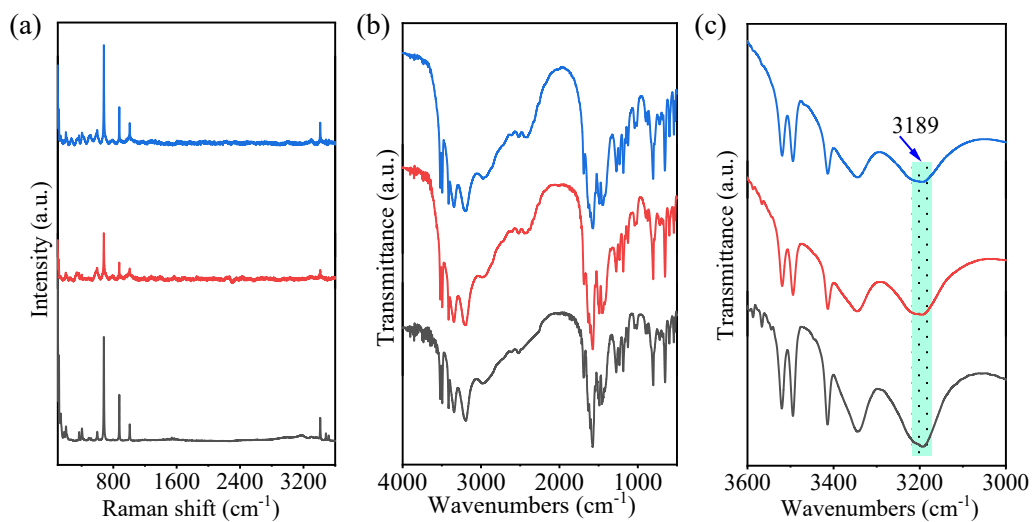

**Figure S2.** Raman (a) and FTIR spectra of M·2B (black line), P1 (red line) and P2 (blue line): (b) in the 500~4000  $\text{cm}^{-1}$  region; (c) in the 3000~3600  $\text{cm}^{-1}$  region.

**Table S2** Spectral data (cm<sup>-1</sup>) and band assignments of M·2B, P1 and P2

| Raman (cm <sup>-1</sup> )                                  |                                                             |                                                            | IR (cm <sup>-1</sup> )                                           |                                                                     |                                                                     | Assignments                                                    |
|------------------------------------------------------------|-------------------------------------------------------------|------------------------------------------------------------|------------------------------------------------------------------|---------------------------------------------------------------------|---------------------------------------------------------------------|----------------------------------------------------------------|
| M·2B                                                       | P1                                                          | P2                                                         | M·2B                                                             | P1                                                                  | P2                                                                  |                                                                |
| 3518 <sub>s</sub> , 3483 <sub>s</sub> , 3410 <sub>vs</sub> | 3518 <sub>vw</sub> , 3483 <sub>vw</sub> , 3410 <sub>m</sub> | 3518 <sub>m</sub> , 3483 <sub>m</sub> , 3410 <sub>vs</sub> | 3520 <sub>s</sub> , 3493 <sub>s</sub> , 3413 <sub>s</sub>        | 3520 <sub>s</sub> , 3493 <sub>s</sub> , 3413 <sub>s</sub>           | 3520 <sub>s</sub> , 3493 <sub>s</sub> , 3413 <sub>s</sub>           | free N-H bonds                                                 |
| 3362 <sub>w</sub> , 3298 <sub>w</sub>                      | 3298 <sub>vwbr</sub>                                        | 3299 <sub>m</sub>                                          | 3345 <sub>s</sub>                                                | 3345 <sub>sbr</sub>                                                 | 3345 <sub>sbr</sub>                                                 | the stretching modes of the hydrogenbonded N-H bonds           |
| 3187 <sub>m</sub>                                          |                                                             |                                                            | 3189 <sub>m</sub>                                                | 3189 <sub>wbr</sub>                                                 | 3189 <sub>wbr</sub>                                                 | O-H stretching mode                                            |
| 1675 <sub>vw</sub>                                         | 1695 <sub>vwbr</sub>                                        | 1647 <sub>vwbr</sub>                                       | 1690 <sub>vvwbrs</sub> , 1669 <sub>vw</sub>                      | 1689 <sub>vvwbrs</sub> , 1670 <sub>vw</sub>                         | 1690 <sub>vwbrs</sub> , 1669 <sub>vw</sub>                          | NH <sub>2</sub> bending                                        |
|                                                            |                                                             |                                                            |                                                                  | 1685 <sub>vw</sub> , 1676 <sub>vw</sub> , 1663 <sub>vw</sub>        |                                                                     | hemiacetal group                                               |
| 1569 <sub>w</sub> , 1535 <sub>w</sub> , 1512 <sub>vw</sub> | 1569 <sub>w</sub>                                           |                                                            | 1576 <sub>wbr</sub> , 1540 <sub>vw</sub> ,<br>1506 <sub>vw</sub> | 1575 <sub>wbrs</sub> , 1540 <sub>vvw</sub> ,<br>1506 <sub>vvw</sub> | 1574 <sub>wbrs</sub> , 1538 <sub>vvw</sub> ,<br>1504 <sub>vvw</sub> | NH <sub>2</sub> bending and Ring distortion                    |
| 1488 <sub>vw</sub>                                         | 1493 <sub>vw</sub>                                          | 1482 <sub>vw</sub>                                         | 1489 <sub>w</sub>                                                | 1490 <sub>w</sub>                                                   | 1489 <sub>w</sub>                                                   | Symmetric bending of the C atoms of triazine ring              |
|                                                            |                                                             |                                                            | 1456                                                             |                                                                     |                                                                     |                                                                |
| 1200 <sub>vw</sub>                                         | 1275 <sub>vw</sub>                                          |                                                            |                                                                  |                                                                     |                                                                     | BOH bend                                                       |
| 1166 <sub>vw</sub>                                         | 1177 <sub>vwbr</sub>                                        | 1166 <sub>vwbr</sub>                                       | 1185 <sub>m</sub> , 1158 <sub>w</sub> , 1125 <sub>m</sub>        | 1185 <sub>m</sub> , 1158 <sub>w</sub> , 1125 <sub>m</sub>           | 1185 <sub>m</sub> , 1158 <sub>w</sub> , 1125 <sub>m</sub>           | Melamine bands corresponding to 1195 and 1175 cm <sup>-1</sup> |
| 1138 <sub>w</sub>                                          |                                                             |                                                            | 1140 <sub>w</sub>                                                | 1140 <sub>vw</sub>                                                  | 1140 <sub>w</sub>                                                   | BOH bend                                                       |
| 1008 <sub>w</sub>                                          | 1008 <sub>vw</sub>                                          | 1008 <sub>w</sub>                                          | 1112 <sub>w</sub>                                                | 1115 <sub>vw</sub>                                                  | 1112 <sub>w</sub>                                                   | Ring breathing mode of N atoms of Symmetric melamine           |
| 876 <sub>m</sub>                                           | 876 <sub>m</sub>                                            | 876 <sub>m</sub>                                           | 873 <sub>m</sub>                                                 | 873 <sub>m</sub>                                                    | 873 <sub>m</sub>                                                    | vB-O                                                           |
| 681 <sub>s</sub>                                           | 681 <sub>s</sub>                                            | 681 <sub>s</sub>                                           | 652 <sub>vs</sub>                                                | 652 <sub>vs</sub>                                                   | 652 <sub>vs</sub>                                                   | Ring breathing mode of C atoms of melamine                     |
| 597 <sub>w</sub> , 520 <sub>vw</sub>                       | 593 <sub>wbrs</sub> , 520 <sub>vvw</sub>                    | 597 <sub>wbrs</sub> , 520 <sub>vwbr</sub>                  | 598 <sub>s</sub> , 538 <sub>s</sub>                              | 598 <sub>w</sub> , 538 <sub>w</sub>                                 | 598 <sub>m</sub> , 538 <sub>m</sub>                                 | OBO bending                                                    |
| 404 <sub>w</sub> , 369 <sub>w</sub>                        | 404 <sub>w</sub> , 369 <sub>w</sub>                         | 404 <sub>w</sub> , 369 <sub>w</sub>                        |                                                                  |                                                                     |                                                                     | CN rocking                                                     |
| 204 <sub>w</sub>                                           | 200 <sub>wbr</sub>                                          | 204 <sub>vw</sub>                                          |                                                                  |                                                                     |                                                                     | OH twist                                                       |
| 181 <sub>w</sub>                                           | 181 <sub>vw</sub>                                           | 181 <sub>vw</sub>                                          |                                                                  |                                                                     |                                                                     |                                                                |
| 138 <sub>w</sub>                                           | 138 <sub>vw</sub>                                           | 138 <sub>vw</sub>                                          |                                                                  |                                                                     |                                                                     | External modes of melamine                                     |
| 114 <sub>w</sub>                                           | 114 <sub>vw</sub>                                           | 114 <sub>vw</sub>                                          |                                                                  |                                                                     |                                                                     | Totally symmetric lattice vibration                            |

v, very; w, weak; m, medium; s strong; br, broad

**Table S3.** Chemical Shifts of  $^{13}\text{C}$  of glucose, P1 and P2

| Sample                                        | C(1)   | C(2)  | C(3)  | C(4)  | C(5)  | C(6)  |
|-----------------------------------------------|--------|-------|-------|-------|-------|-------|
| C <sub>6</sub> H <sub>12</sub> O <sub>6</sub> | 111.11 | 87.52 | 99.64 | 78.43 | 91.70 | 68.95 |
| P1                                            | 108.66 | 85.25 | 99.64 | 75.07 | 92.97 | 69.44 |
| P2                                            | 110.96 | 87.52 | 99.95 | 72.66 | 92.85 | 67.76 |

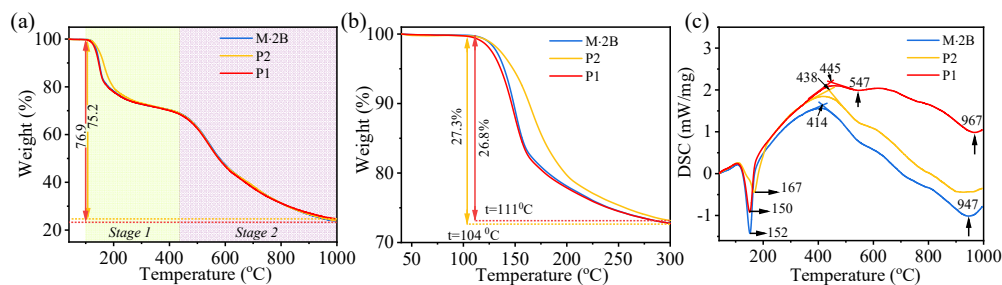

**Figure S3.** TGA thermograms of M·2B, P1 and P2 samples: (a) from 40 to 1000 °C in N<sub>2</sub>; (b) from 40 to 300 °C in N<sub>2</sub> and (c) DSC curves of M·2B, P1 and P2 samples from 40 °C to 1000 °C in N<sub>2</sub>.

The whole pyrolysis procedure can be divided into two weight-loss stages (Figure S3a). In the first stage (100 ~ 300 °C), there is a sharp endothermic peak from 150 °C to 167 °C for three different precursors due to intense weight loss corresponding to the release of H<sub>2</sub>O (Figure S3c). The temperature of endothermic peaks of P1 (150 °C) and P2 (167 °C) is different from that of M·2B. The weight loss of P1 is 0.5 wt.% more than that of M·2B (Figure S3b). It can be clearly observed that the weight loss of P1 (1.7 wt.%) is less than that of P2 (Figure S3b), indicating that glucose is more evenly dispersed in P1 and more carbon element remained in p-BCN-1 structure by thermal decomposition of P1 comparing with P2. The temperatures of exothermic peaks of P1 (445 °C) and P2 (438 °C) are higher from that of M·2B (413 °C) as displayed in Figure S3c, and an endothermic peak at 547 °C was only detected in P1.

According to the TG-DSC analysis, it is reasonably predicted to obtain more effective p-BCN by calcining the precursors slowly overheating from 100 °C to 300 °C. Therefore, the precursor was heated in an N<sub>2</sub> atmosphere at 300 °C for 2 h with a ramp rate of 2 °C·min<sup>-1</sup> and enough time under static heating at 300 °C, which ensures the

reactions to proceed completely. During the second stage, the gravimetric curve is gradually downward from 430 °C to 1000 °C, attributed to the release of  $\text{NH}_3$  occurring in the range of 430~600 °C due to the condensation of melamine, and the release of  $\text{CO}_2$  happening at ca. 450 °C and reach to the substantial release in the range of 500~700 °C, the release of HCN and  $\text{CO}_2$  occurring in the range of 700~1000 °C [3]. Those results exhibit in the form of weight loosening.



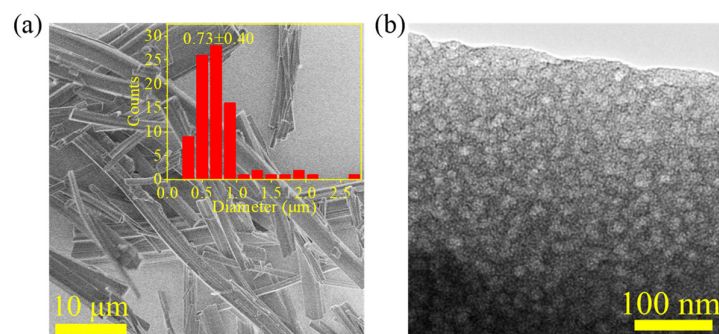

**Figure S4.** (a) The SEM image of p-BCN-1, inset: the diameter distribution histogram. (b) The HRTEM image of p-BCN-1

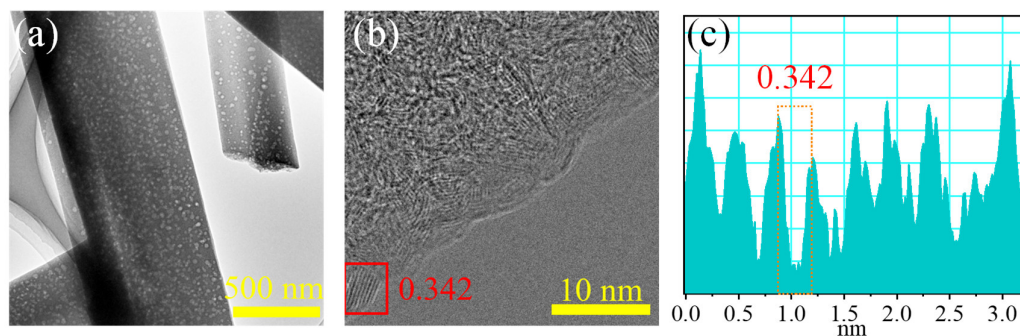

**Figure S5.** Morphologies of the p-BN: (a) TEM (scale bar: 500 nm); (b) HRTEM (scale bar: 10 nm). (c) Measured the layer distance of the red rectangle of (b), the interspacing is 0.342 nm.

**Table S4.** Physical and textural properties of p-BN, p-BCN-1 and p-BCN-2

| Sample  | $S_{\text{BET}}^a$<br>(m <sup>2</sup> /g) | $V_{\text{pore}}^b$<br>(cm <sup>3</sup> /g) | $D_{\text{pore}}^c$<br>(nm) |
|---------|-------------------------------------------|---------------------------------------------|-----------------------------|
| p-BN    | 1018                                      | 0.651                                       | 2.5                         |
| p-BCN-1 | 918                                       | 0.605                                       | 2.7                         |
| p-BCN-2 | 730                                       | 0.512                                       | 2.8                         |

<sup>a</sup> Specific surface area by BET method. <sup>b</sup>Pore volume at  $p/p_0=0.99$ .

<sup>c</sup> BJH desorption average pore width.

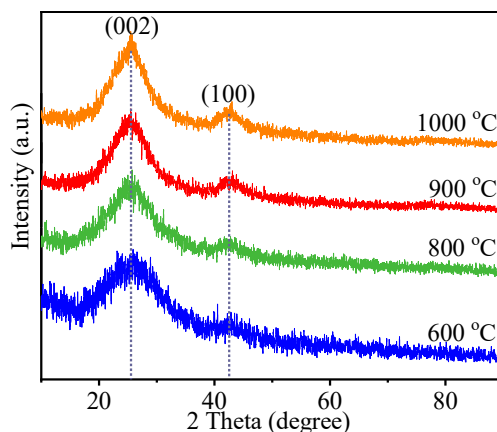

**Figure S6.** Powder XRD patterns of calcined product p-BCN-1 of the P1 at different temperatures.

The sample calcined at 600 °C only shows a broadened and weak XRD diffraction peak at  $2\theta = 25.7^\circ$  corresponded to (002) plane, exhibiting the poor crystallinity of h-BN. When the calcination temperature rises to 800 °C, a new peak appears at  $2\theta = 42.7^\circ$ , which belongs to the (100) plane. As the calcination temperature rising to 900 °C and 1000 °C, two similarly diffraction peaks appear, with slight band sharpening and an increase of the band intensity of (002) and (100) planes, accompanied by a slight shift of the peak to higher angles (ca.  $2\theta = 25.6\sim 25.7^\circ$ ) than that of p-BN, which are between the  $2\theta$  value of graphene and h-BN [4]. The results confirm that higher crystallinity directly correlates with higher calcination temperature.

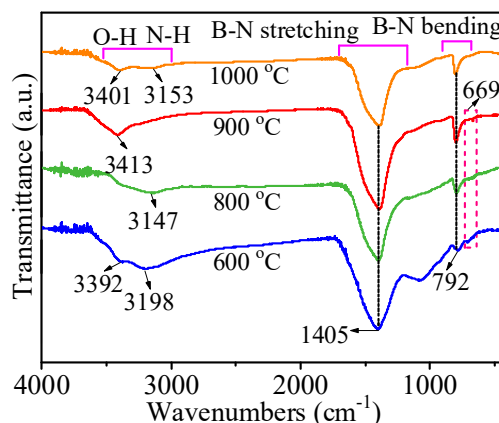

**Figure S7.** FTIR spectra of calcined product p-BCN-1 of the P1 at different temperatures.

In the FTIR spectra, it is found that the sample calcined at 600 °C has a broadened peak and a very weak peak at 1405  $\text{cm}^{-1}$  and 792  $\text{cm}^{-1}$ , assigned to the in-plane stretching bands of  $sp^2$ -bonded B–N and the out-of-plane B–N bending bands of  $sp^2$ -bonded B–N–B, respectively, as well as several weak peaks between the two peaks, meaning intrinsic structure of h-BN is formed incompletely. However, as calcination temperatures increased from 800 °C to 1000 °C, a slight band sharpening and an increase of the band intensity of peaks at 1405  $\text{cm}^{-1}$  and 792  $\text{cm}^{-1}$  of intrinsic structure of h-BN were observed, inferring the intrinsic structure of h-BN is formed gradually. The results are consistent with the XRD analysis. The broad bands ranging from 3100  $\text{cm}^{-1}$  to 3450  $\text{cm}^{-1}$  can be assigned to B–OH and B–NH<sub>2</sub>.

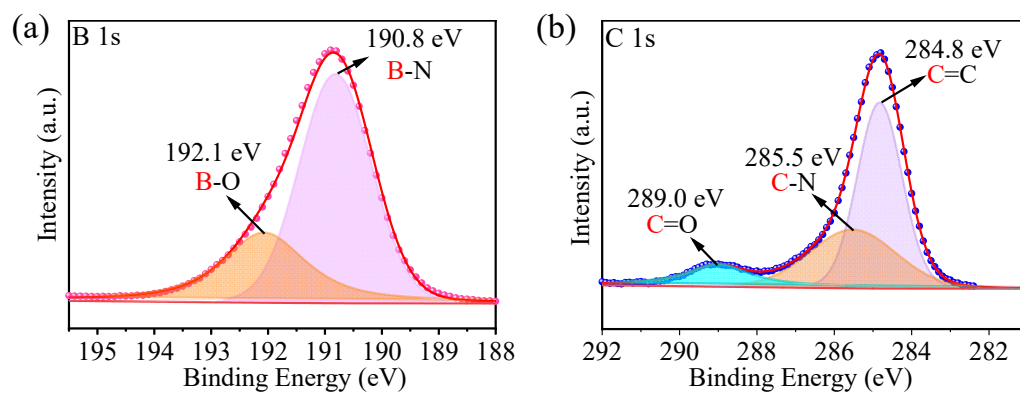

**Figure S8.** XPS high-resolved spectra of p-BN, (a) B 1s and (b) C 1s.

**Table S5.** The peak position and relative atomic percentage of various functional groups in p-BN, p-BCN-1 and p-BCN-2 samples

| Sample  | B     |      |       |       |       |       | N     |       |       |       | C     |       |       |       |       |       |       |       | O     |       |       |       |       |       |
|---------|-------|------|-------|-------|-------|-------|-------|-------|-------|-------|-------|-------|-------|-------|-------|-------|-------|-------|-------|-------|-------|-------|-------|-------|
|         | B-C   |      | B-N   |       | B-O   |       | N-B   |       | N-C   |       | B-C   |       | C=C   |       | C-N   |       | C=O   |       | B-O   |       | C=O   |       | C-O-C |       |
|         | eV    | %    | eV    | %     | eV    | %     | eV    | %     | eV    | %     | eV    | %     | eV    | %     | eV    | %     | eV    | %     | eV    | %     | eV    | %     | eV    | %     |
| p-BN    | -     | -    | 190.8 | 67.63 | 192.1 | 32.36 | 398.4 | 58.59 | 398.8 | 41.41 | -     | -     | 284.8 | 54.36 | 285.5 | 32.51 | 289.0 | 13.12 | 531.7 | 22.42 | 532.6 | 42.53 | 533.3 | 35.05 |
| p-BCN-1 | 189.9 | 5.94 | 190.8 | 59.88 | 192.1 | 34.17 | 398.3 | 65.56 | 399.0 | 34.44 | 284.1 | 21.25 | 284.8 | 42.38 | 286.0 | 21.44 | 289.0 | 14.93 | 531.7 | 30.71 | 532.6 | 44.18 | 533.5 | 25.11 |
| p-BCN-2 | 189.9 | 2.72 | 190.8 | 61.73 | 192.1 | 35.55 | 398.4 | 67.54 | 398.8 | 32.46 | 284.1 | 4.33  | 284.8 | 56.77 | 285.7 | 30.47 | 289.0 | 8.42  | 531.7 | 21.23 | 532.6 | 39.85 | 533.3 | 38.91 |

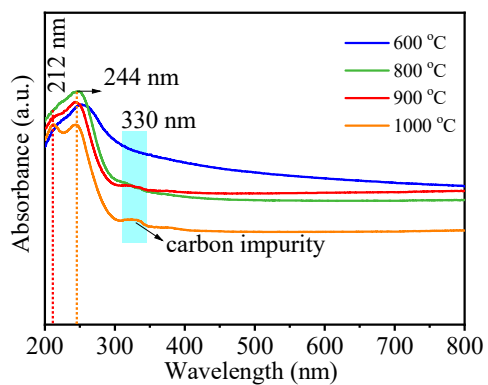

**Figure S9.** UV-vis diffuse reflectance spectra of calcined product p-BCN-1 of the P1 at different temperatures.

Only an absorption peak at around 244 nm is detected at 600 °C and 800 °C. With the increase of calcination temperature, three absorption peaks are obtained at about 212, 244 and 330 nm at 900 °C and 1000 °C, respectively.



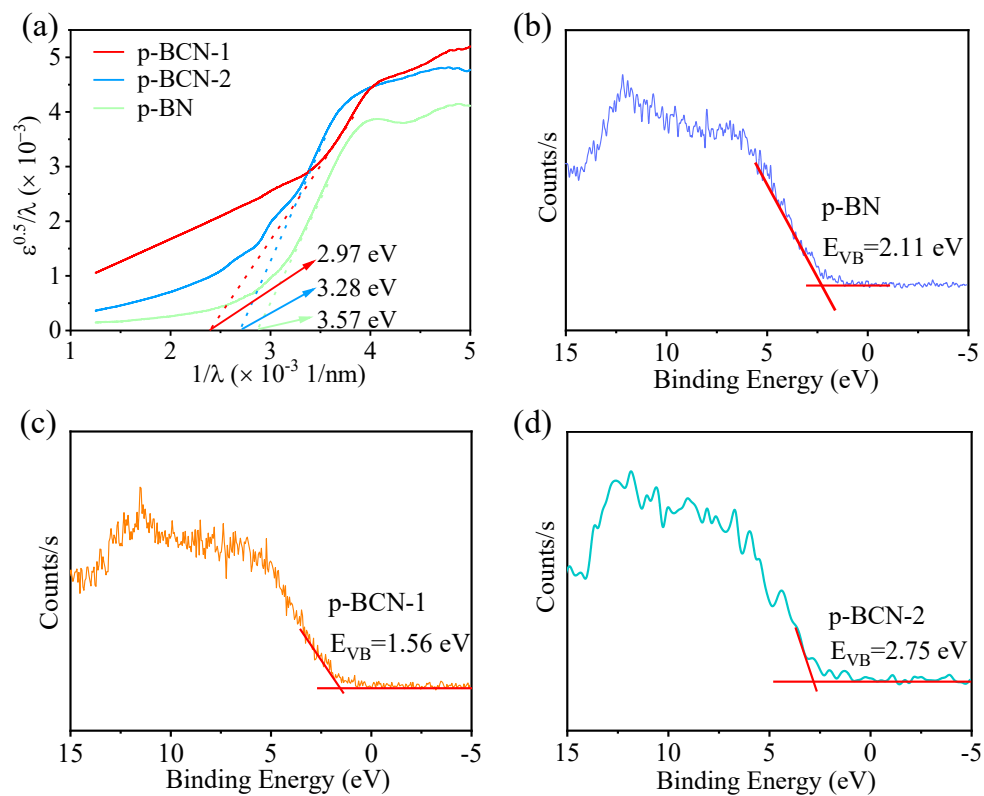

**Figure S10.** (a) Plots of  $\epsilon^{0.5}/\lambda$  versus  $1/\lambda$  based on the optical absorption data from p-BN, p-BCN-1 and p-BCN-2 samples, respectively. VB-XPS spectra of (b) p-BN, (c) p-BCN-1 and (d) p-BCN-2.

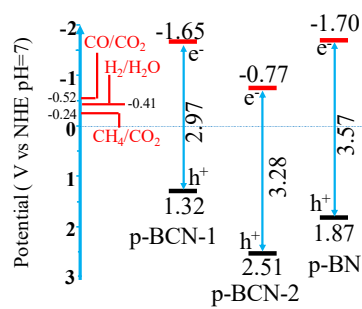

**Figure S11.** Schematic illustration of the band structures of p-BN, p-BCN-1 and p-BCN-2 samples, the redox potential of CO<sub>2</sub> at pH=7, with respect to NHE.

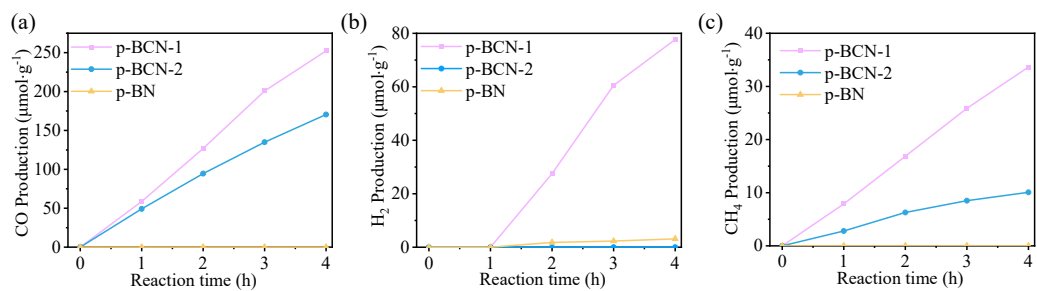

**Figure S12.** Photocatalytic activities over the p-BN, p-BCN-1 and p-BCN-2 samples:

(a) CO production, (b)  $\text{H}_2$  production and (c)  $\text{CH}_4$  production.

## 1. Experimental section

### *1.1 Apparatus and characterization*

X-ray diffraction (XRD) patterns of the as-obtained samples were characterized on an X-ray diffractometer (D/MAX-2500, Rigaku, Japan), operating at 40 kV and 150 mA using Cu  $K_{\alpha}$  radiation ( $\lambda=0.15406$  nm) with a scanning angle  $2\theta$  of 5~100°. Fourier transform infrared spectra (FTIR) of the samples were performed on a FTIR spectrometer (Prestige-21, Shimadzu, Japan, 400~4000  $\text{cm}^{-1}$ ) using KBr as the reference sample. Raman spectra were acquired by a Raman microspectrometer (LabRAM HR Evolution, HORIBA J Y, France, 100~4000  $\text{cm}^{-1}$ ) at a resolution of 0.6  $\text{cm}^{-1}$  using a 532 nm laser excitation. Element analysis (Elementar vario EL cube, Thermal Conductivity Detector) was used to measure the precise carbon (C), nitrogen (N) and hydrogen (H) in the composites by CHN mode. The element chemical state of the samples was investigated on an X-ray photoelectron spectrometer (Thermo Scientific K-Alpha<sup>+</sup>, Thermofisher, US) using Al  $K_{\alpha}$  radiation ( $h\nu=1486.6$  eV).  $^{11}\text{B}$ ,  $^{13}\text{C}$  and  $^1\text{H}$  solid state nuclear magnetic resonance (NMR) spectra of the materials were recorded on an Agilent 600M equipped with a Bruker DSX-300 spectrometer accompanied by high power decoupling using a Bruker 4mm magic angle spinning (MAS) probe head. The spinning rate was 8 kHz, and the delay between the two pulses was varied between 1 and 30 s to ensure complete relaxation of the  $^{31}\text{P}$  nuclei. The chemical shifts were given relative to external TMS for the proton and carbon and  $\text{BF}_3\text{OEt}_2$  for boron. Morphology of the samples was obtained by scanning electron microscope (SEM) (S-4800, Hitachi, Japan, 10.0 kV) and a bright field and the high

resolution transmission electron microscope (FEI Titan<sup>TM</sup> ETEM G2) images were collected at 300 kV accelerating voltage. Electron energy loss spectroscopy (EELS) analysis was performed to determine the distribution of carbon. UV-vis diffuse reflectance spectroscopy (UV-vis DRS) was measured with BaSO<sub>4</sub> as the background on a Scan UV-vis system (SHIMADZU-2550, Shimadzu, Japan, 200~800 nm) combined with an integrating sphere attachment. Thermogravimetric analysis (TG) and differential scanning calorimetry (DSC) of the sample were performed on a TG/DSC analyzer (NETZSCH STA 449F5, Germany) at a rate of 5 °C/min under N<sub>2</sub> flow. Brunauer-Emmett-Teller (BET) surface areas were examined by N<sub>2</sub> adsorption-desorption isotherms instrument (Tristar II 3020 2.00, Micromeritics, US, 77 K). The pore-size distribution curve and porosity properties were determined by the Barret, Joyner, and Halenda (BJH) method. Electrochemical impedance spectra (EIS) and photocurrent were detected on a CHI 660E electrochemical system (CH Instruments, China) under xenon light irradiation. A three-electrode quartz cell was used for measurement with Pt as the counter electrode, Ag/AgCl as reference electrode, the thin film of p-BCN or p-BN on indium–tin oxide (ITO) glass as the working electrode, and 0.2 mol L<sup>-1</sup> Na<sub>2</sub>SO<sub>4</sub> aqueous solutions as the electrolyte, respectively. The electron paramagnetic resonance (EPR) of samples was measured using Bruker EMX PLUS. The resonance frequency is 9.82 GHz.

### *1.2 Photocatalytic performance test for CO<sub>2</sub> reduction*

The photocatalytic reduction of CO<sub>2</sub> was conducted in a 150 mL gas-closed quartz glass reactor on an online photoreaction system (Beijing Perfectlight, LabSolarIIIAG).

In a typical photocatalytic CO<sub>2</sub> reduction reaction, 50 mg of sample was evenly dispersed in a quartz Petri dish with an irradiation area of 28 cm<sup>2</sup>. Then, the other dish with 3 mL of deionized water was put in the reactor and the quartz Petri dish was put on it. The reaction system was continuously purged with high purity CO<sub>2</sub> gas (1 atm) in the dark for 30 min to achieve CO<sub>2</sub> adsorption-desorption equilibrium before light irradiation. The reactor was irradiated by a 300 W Xe lamp (PLS-SXE300) with a focus intensity of 0.61 W/cm<sup>2</sup> to simulate the sunlight. The photocatalytic test was performed at room temperature controlled by a low-temperature thermostat bath system. Every 2 h, 1 mL of the generated gaseous products (CO, H<sub>2</sub> and CH<sub>4</sub>) were collected and quantified by using GC9700 gas chromatography (Fuli instruments, China) equipped with Thermal Conductivity Detector (TCD) and Flame Ionization Detector (FID) using N<sub>2</sub> as the carrier gas.

The reduction selectivity of CO, CH<sub>4</sub> and H<sub>2</sub> can be described as [5]:

$$S_{CO} = \frac{2R_{CO}}{2R_{CO} + 8R_{CH_4} + 2R_{H_2}} \times 100\%$$

$$S_{CH_4} = \frac{8R_{CH_4}}{2R_{CO} + 8R_{CH_4} + 2R_{H_2}} \times 100\%$$

$$S_{H_2} = \frac{2R_{H_2}}{2R_{CO} + 8R_{CH_4} + 2R_{H_2}} \times 100\%$$

Herein,  $R$  represents the productive rates of products.

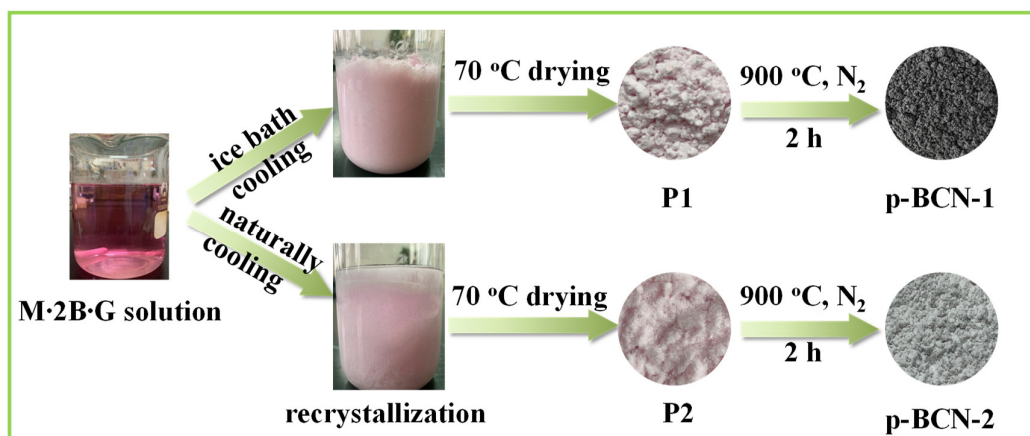

**Figure S13.** Photographic synthesis of the p-BCN samples by two different cooling modes.

M·2B·G solution is slightly acidic at pH 5.5, the solution appears pink due to the formation of hydrogen bonds between the free N–H bonds of melamine and the O–H bonds of glucose under acidic conditions.

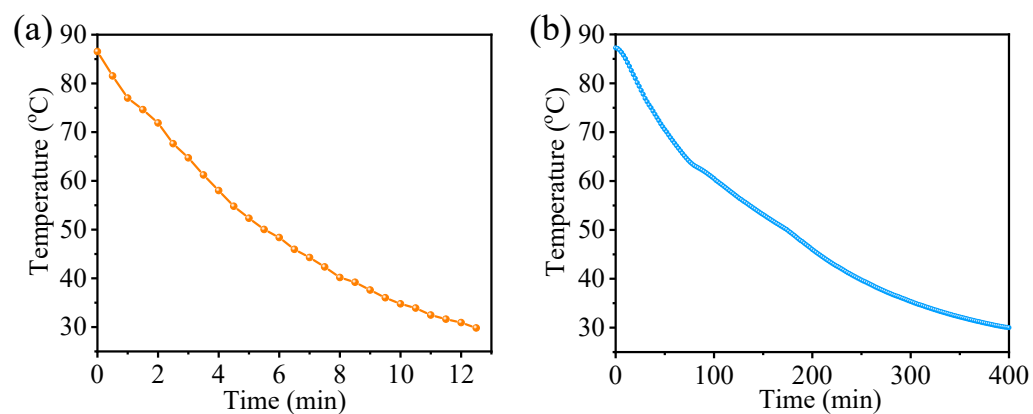

**Figure S14.** Cooling curves of (a) P1 and (b) P2. When the temperature of M·2B·G aqueous solution dropped from 90 °C to 30 °C, it took 12 min by ice bath rapid cooling (The temperature of the ice water bath was 4 °C), while it took 400 min by natural cooling.



## References

1. Roy, A.; Choudhury, A.; Rao, C.N.R. Supramolecular hydrogen-bonded structure of a 1:2 adduct of melamine with boric acid. *J. Mol. Struct.* **2002**, 613, 61-66.
2. Wang, K.; Duan, D.; Wang, R.; Lin, A.; Cui, Q.; Liu, B.; Cui, T.; Zou, B.; Zhang, X.; Hu, J.; Zou, G.; Mao, H.-k. Stability of hydrogen-bonded supramolecular architecture under high pressure conditions: Pressure-induced amorphization in melamine-boric Acid adduct. *Langmuir* **2009**, 25, 4787-4791.
3. Wu, C.; Wang, B.; Wu, N.; Han, C.; Zhang, X.; Shen, S.; Tian, Q.; Qin, C.; Li, P.; Wang, Y. Molecular-scale understanding on the structure evolution from melamine diborate supramolecule to boron nitride fibers. *Ceram. Int.* **2020**, 46, 1083-1090.
4. Wang, J.; Hao, J.; Liu, D.; Qin, S.; Portehault, D.; Li, Y.; Chen, Y.; Lei, W. Porous boron carbon nitride nanosheets as efficient metal-free catalysts for the oxygen reduction reaction in both alkaline and acidic solutions. *ACS Energy Lett.* **2017**, 2, 306-312.
5. Fu, J.; Jiang, K.; Qiu, X.; Yu, J.; Liu, M. Product selectivity of photocatalytic CO<sub>2</sub> reduction reactions, *Mater. Today*, **2020**, 32, 222-243.
